# Supplementary material for: CTRP3 as a novel biomarker in the plasma of Saudi children with autism
Source: PeerJ. 2022 Jan 11;10:e12630. doi: 10.7717/peerj.12630 (PMC8759357; doi:10.7717/peerj.12630)
Supplement: Supplemental Information 1 [file peerj-10-12630-s001.xlsx]

## Sheet: Sheet1
		com.
patients
Mean	Age	CARS	SRS	Sensory profile
0.988	8	45
0.538	7	38
0.612	5	42		101
0.569	5	42
0.302	5	41/38	81
0.583	6	44
0.128	7	45		138
0.293	6	48
0.347	7.2 Y	45
0.289	9 Y-3.8	31
0.257	8.9	37
0.501	10	41		159
0.619	7	38
0.69	9 Y	18.5	66
0.382	8	44
0.258	11Y NO DOB	34
0.195	16	35		180
0.322	11	36.5	81
0.533
0.412	10 Y	41
0.361	12	34		182
0.576	4 y	(HF) 30	67
0.448		42
0.556		45
0.224		35
0.297		35
0.521
0.229		45
0.222	9	40		133
0.231		42
0.314		35
0.464		37
Control
Conc	Count	Mean
0.3	1	0.3
0.653	1	0.653
0.292	1	0.292
0.33	1	0.33
0.644	1	0.644
>1.050	0	?????
0.211	1	0.211
0.238	1	0.238
0.27	1	0.27
0.496	1	0.496
0.204	1	0.204
0.293	1	0.293
0.259	1	0.259
>1.050	0	?????
0.334	1	0.334
0.482	1	0.482
0.437	1	0.437
0.452	1	0.452
0.332	1	0.332
0.501	1	0.501
0.681	1	0.681
0.309	1	0.309
0.326	1	0.326
0.218	1	0.218
0.297	1	0.297
0.491	1	0.491
0.283	1	0.283
0.316	1	0.316
0.403	1	0.403
0.184	1	0.184
0.209	1	0.209
0.234	1	0.234
0.125	1	0.125
0.394	1	0.394
0.236	1	0.236
0.257	1	0.257
0.203	1	0.203
0.139	1	0.139
0.262	1	0.262
